# Supplementary material for: Simple method to quantify extraneous water and organic matter degradation in sewer networks
Source: Royal Society of Chemistry journal article supplement (doi:10.1039/d0ew00735h), 2020-11-12
Supplement: d0ew00735h1.xlsx [file d0ew00735h1.xlsx]

## Sheet: QA data
Table S4. QA data
Site	Date	Influent COD concentration			Influent TP concentration
		Manual	On-line	RD	Manual	On-line	RD
WWTP 1	2018-08-14	28	26.84	-0.0414286	0.46	0.423	-0.0804348
	2018-09-20	44	46.34	0.0531818	1.06	1.139	0.0745283
	2018-10-17	56	51.63	-0.0780357	1.88	1.928	0.0255319
	2018-11-07	48	49.89	0.039375	2.21	2.19	-0.00904977
	2018-12-11	51	50.05	-0.0186275	2.13	2.197	0.0314554
WWTP 2	2018-08-08	86	84.76	-0.0144186	0.52	0.493	-0.0519231
	2018-09-12	38	38.36	0.00947368	1.03	0.997	-0.0320388
	2018-10-08	102	95.01	-0.0685294	2.28	2.33	0.0219298
	2018-11-06	63	66.77	0.0598413	1.59	1.662	0.045283
	2018-12-04	56	53.83	-0.03875	1.89	1.863	-0.0142857
Note：The manual monitoring and on-line monitoring are conducted on the same day, but the samples are collected separately.
