# Supplementary material for: Simple method to quantify extraneous water and organic matter degradation in sewer networks
Source: Royal Society of Chemistry journal article supplement (doi:10.1039/d0ew00735h), 2020-11-12
Supplement: d0ew00735h2.xlsx [file d0ew00735h2.xlsx]

## Sheet: Data of WWTPs(2)
Table S1. On-line monitoring data of the influent wastewater of WWTPs
Date	Flow rate of WWTP 1 (m3 d-1)	Average TP concentration of WWTP 1 (mg L-1)	Average COD concentration of WWTP 1 (mg L-1)	Flow rate of WWTP 2 (m3 d-1)	Average TP concentration of WWTP 2 (mg L-1)	Average COD concentration of WWTP 2 (mg L-1)
2018-07-01	11167	1.259	19.56	1407	0.451	88.46
2018-07-02	3767	1.204	20.4	1047	0.409	88.47
2018-07-03	6005	0.926	19.27	1334	0.399	122.47
2018-07-04	8250	0.648	18.14	1621	0.451	118.52
2018-07-05	10482	0.37	17.01	1107	0.438	116.98
2018-07-06	11536	1.325	15.88	1542	0.524	97.12
2018-07-07	12362	1.239	14.75	2286	0.414	103.96
2018-07-08	10036	1.184	13.62	2229	0.494	77.36
2018-07-09	10362	1.39	12.49	1833	0.516	72.35
2018-07-10	11375	1.031	14.94	2100	0.48	83.76
2018-07-11	10960	1.087	16.61	2280	0.537	73.69
2018-07-12	11923	0.737	11.97	2097	0.458	91.58
2018-07-13	12195	0.942	15.46	1475	0.388	99.85
2018-07-14	11562	0.543	7.83	1436	0.357	126.36
2018-07-15	11485	0.401	5.365	1333	0.367	121.05
2018-07-16	13553	0.259	2.9	1706	0.45	108.15
2018-07-17	12270	1.456	5.7	2020	0.349	110.04
2018-07-18	13777	1.343	27.82	2045	1.161	104.62
2018-07-19	12768	1.453	20.72	1525	0.823	132.53
2018-07-20	12813	0.766	18.86	1615	1.033	195.41
2018-07-21	12121	1.688	39.7	1794	1.077	123.31
2018-07-22	9072	1.875	59.14	3732	0.665	94.54
2018-07-23	11541	1.787	46.03	2032	0.631	76.13
2018-07-24	13437	0.58	6.68	2164	0.744	69.35
2018-07-25	12221	0.995	4.44	1891	0.678	55.22
2018-07-26	12126	1.135	3.52	1989	0.828	68.33
2018-07-27	11903	1.311	2.6	1986	1.094	98.31
2018-07-28	12351	1.401	1.68	2214	0.949	95.96
2018-07-29	13093	1.543	13.1	2058	0.971	92.66
2018-07-30	13060	1.334	9.55	1992	0.85	117.04
2018-07-31	13183	1.171	4.82	4694	0.86	93.77
2018-08-01	12620	0.373	8.63	5399	0.947	68.71
2018-08-02	12755	0.989	20.97	4139	0.698	92.2
2018-08-03	9647	1.23	25.8	3128	0.663	113.67
2018-08-04	11755	0.681	20.89	4399	0.472	88.74
2018-08-05	11965	0.686	2.99	4750	0.439	89.14
2018-08-06	11395	0.858	5.21	4364	0.465	86.21
2018-08-07	10251	1.017	24.29	5122	0.473	87.56
2018-08-08	11420	0.624	10.16	4413	0.493	84.76
2018-08-09	11863	1.06	23.79	4337	1.625	78.7
2018-08-10	10944	1.334	24.97	4559	1.981	75.1
2018-08-11	13045	1.169	24.31	7377	1.198	86.13
2018-08-12	11637	0.917	23.01	5153	0.227	55.6
2018-08-13	11019	0.67	21.42	4451	0.257	60.41
2018-08-14	11793	0.423	26.84	5519	0.286	70.02
2018-08-15	10843	1.155	24.45	6155	1.61	82.18
2018-08-16	11112	1.265	28.11	5678	1.804	58.76
2018-08-17	15161	2.731	81.47	4507	1.762	61.3
2018-08-18	15116	2.228	60.6	5314	2.156	65.07
2018-08-19	12898	1.62	42.93	4146	2.942	99.33
2018-08-20	11394	1.692	14.67	5110	2.16	76.49
2018-08-21	10885	1.788	50.5	4815	2.123	83.7
2018-08-22	11171	1.768	49.2	9438	1.712	77.75
2018-08-23	9561	1.043	43.23	6675	1.453	51.1
2018-08-24	9715	1.063	44.24	5606	1.529	54.52
2018-08-25	9631	1.376	43.85	5165	0.853	27.22
2018-08-26	9633	1.314	45.59	6305	1.629	95.08
2018-08-27	9668	1.029	33.88	6219	1.456	45.19
2018-08-28	9666	1.256	29.21	3922	1.559	51.2
2018-08-29	9706	1.398	30.21	4834	1.63	54.71
2018-08-30	4511	1.63	38.94	6815	1.528	49.3
2018-08-31	5478	1.602	38.08	6206	1.613	49.85
2018-09-01	8803	1.487	36.89	5036	1.432	39.95
2018-09-02	9427	1.458	35.74	5350	1.355	50.33
2018-09-03	10903	1.464	34.06	4948	0.963	46.33
2018-09-04	16768	1.393	34.47	3400	0.906	48.1
2018-09-05	15653	1.628	39.88	4653	0.909	48.06
2018-09-06	14738	1.422	37.14	3982	0.925	52.43
2018-09-07	14400	1.508	38.92	5462	1.361	71.31
2018-09-08	14848	1.326	38.02	5075	1.52	80.4
2018-09-09	12681	0.853	30.04	5681	0.965	15.39
2018-09-10	12087	0.958	26.87	3139	0.926	9.61
2018-09-11	12459	1.138	28.07	5505	1.067	38.59
2018-09-12	12604	1.066	31.87	4534	0.997	38.36
2018-09-13	12974	1.573	38.72	4997	0.997	31.69
2018-09-14	12568	1.638	33.7	4218	1.036	35.25
2018-09-15	12622	1.189	36.76	4636	1.059	37.66
2018-09-16	13029	0.421	43.91	3923	1.167	38.6
2018-09-17	13362	1.184	46.36	4677	1.495	47.82
2018-09-18	13845	1.452	52.78	5878	0.963	38.73
2018-09-19	13828	1.457	54.29	5090	0.816	26.56
2018-09-20	13258	1.139	46.34	4667	1.009	39.83
2018-09-21	12965	1.45	51.61	3156	1.159	40.78
2018-09-22	12705	1.703	57.08	3807	2.026	55.6
2018-09-23	13025	1.864	58.1	3429	2.893	53.15
2018-09-24	12340	1.999	63.76	2544	3.76	64.98
2018-09-25	12801	1.375	36.93	3527	3.514	58.02
2018-09-26	10958	2.049	65.49	3644	3.169	46.81
2018-09-27	10120	2.186	66.44	4706	3.076	48.27
2018-09-28	9930	2.198	68.76	3901	2.713	67.38
2018-09-29	10100	2.253	81.2	4723	3.361	115.76
2018-09-30	10740	1.918	65.26	3981	2.928	69.39
2018-10-01	11946	2.168	32.81	4169	2.665	67.33
2018-10-02	10964	2.245	58.89	4233	2.892	57.13
2018-10-03	11190	2.093	53.14	4295	3.038	93.08
2018-10-04	11367	2.452	64.22	4289	3.651	116.21
2018-10-05	11311	2.008	51.42	4211	3.115	105.22
2018-10-06	12897	2.38	63.91	4116	2.36	99.29
2018-10-07	11837	2.719	80.03	4402	1.982	77.65
2018-10-08	10475	2.388	66.24	4073	2.33	95.01
2018-10-09	10250	2.031	51.58	4391	1.779	80.47
2018-10-10	9096	2.252	56.82	3782	1.439	60.35
2018-10-11	12715	1.918	49.35	4459	1.521	64.73
2018-10-12	13015	0.87	22	3223	1.962	141.07
2018-10-13	13290	1.403	44.63	3556	1.533	117.89
2018-10-14	14900	1.396	44.93	4128	1.454	98.86
2018-10-15	14189	1.78	51.56	3828	1.558	98.97
2018-10-16	14645	1.78	52.95	3444	1.963	119.61
2018-10-17	13634	1.928	51.63	3571	2.056	126.32
2018-10-18	14041	1.515	47.86	3830	1.669	99.82
2018-10-19	13878	1.77	43.77	4446	1.508	91.34
2018-10-20	13761	1.904	46.79	3790	1.829	100.21
2018-10-21	13693	1.956	46.54	4096	1.839	103.72
2018-10-22	13637	2.228	54.33	3518	1.48	92.33
2018-10-23	10716	2.538	64.28	4481	1.842	103.39
2018-10-24	4340	2.473	61.06	3306	1.53	91.75
2018-10-25	6500	2.327	56.24	4412	1.96	131.3
2018-10-26	8679	2.275	51.44	4337	1.751	65.86
2018-10-27	10848	2.016	46.5	4376	1.686	9.66
2018-10-28	10082	2.205	52.74	4103	1.565	31.01
2018-10-29	10123	2.309	54.5	2835	2.16	56.28
2018-10-30	10116	2.141	52.87	4235	1.571	41.24
2018-10-31	9794	1.633	45.21	4343	1.498	71.89
2018-11-01	10074	2.693	52.2	3708	1.865	79.28
2018-11-02	10820	2.043	41.46	4435	1.801	79.03
2018-11-03	10963	2.508	54.01	3857	1.906	105.1
2018-11-04	9260	2.128	45.91	4476	1.748	74.02
2018-11-05	9596	2.101	45.51	3386	1.753	66.71
2018-11-06	9760	2.045	46.54	4117	1.662	66.77
2018-11-07	9506	2.19	49.89	4867	1.695	70.09
2018-11-08	9712	2.324	20.05	3918	1.627	71.73
2018-11-09	11000	4.022	80.95	4279	1.84	77.94
2018-11-10	9783	1.966	52.03	4878	1.837	80.88
2018-11-11	9743	2.16	54.9	4094	1.94	92
2018-11-12	9699	2.365	60.56	4681	1.966	90.16
2018-11-13	9159	2.648	68.39	3748	1.859	83.47
2018-11-14	11413	2.555	66.24	4077	2.573	124.34
2018-11-15	14002	1.995	51.26	3834	0.237	99.28
2018-11-16	9801	2.115	56.98	4154	0.263	90.97
2018-11-17	9619	1.864	53.4	3375	0.288	92.09
2018-11-18	9624	1.989	54.31	4078	1.977	104.58
2018-11-19	9791	2.052	55.2	3264	1.92	100.62
2018-11-20	9989	1.934	52.23	4262	1.596	103.26
2018-11-21	9825	1.808	48.95	3509	1.842	108.17
2018-11-22	11414	2.044	57.77	3652	1.962	104.94
2018-11-23	10295	2.1	68.74	3294	1.215	115.97
2018-11-24	9808	2.284	65.56	3145	0.468	118.27
2018-11-25	10386	1.951	53.62	3479	1.714	104.78
2018-11-26	9562	1.99	54.51	3670	1.892	120.65
2018-11-27	10564	2.02	55.51	3953	1.726	49.03
2018-11-28	9775	1.827	49.67	2928	1.764	52.52
2018-11-29	10811	1.832	49.61	2267	1.718	73.17
2018-11-30	10052	1.806	51.05	1393	2.45	124.55
2018-12-01	9841	0.442	46.74	2981	2.302	91.06
2018-12-02	9604	2.152	53.16	4287	1.78	72.45
2018-12-03	9953	2.028	51.96	3124	1.775	63.14
2018-12-04	9832	1.848	45.83	2922	1.863	53.83
2018-12-05	9394	1.863	48.67	2887	1.919	105.19
2018-12-06	8524	2.057	47.49	2755	1.908	108.21
2018-12-07	10336	1.816	44.54	3275	1.357	135.91
2018-12-08	9418	1.96	48.23	2208	0.58	111.63
2018-12-09	9675	2.022	48.33	2818	2.024	99.92
2018-12-10	7961	2.902	67.68	3316	2.4	150.01
2018-12-11	8760	2.197	50.05	1970	2.347	140.12
2018-12-12	8270	1.948	31.75	2794	2.482	133.13
2018-12-13	8457	2.972	57.57	2896	1.902	112.07
2018-12-14	7672	1.98	38.98	2954	2.347	134.65
2018-12-15	9536	2.13	45.37	2662	1.942	97
2018-12-16	9940	2.104	57.92	2829	2.183	105.36
2018-12-17	9015	2.175	54.76	1787	2.463	114.71
2018-12-18	8150	2.17	50.31	2175	3.12	151.08
2018-12-19	13502	1.984	61.04	3834	1.835	134.37
2018-12-20	13424	1.214	37.61	2261	2.651	125.34
2018-12-21	11564	1.538	42.36	2974	2.427	146.96
2018-12-22	11423	1.61	37.58	2950	2.32	117.31
2018-12-23	11419	1.628	36.49	1730	2.72	122.71
2018-12-24	12713	2.275	48.55	1702	3.476	175.14
2018-12-25	13149	3.109	69.78	3708	2.299	108.18
2018-12-26	8015	1.598	39.58	4747	2.214	117.01
2018-12-27	8291	1.402	91.08	4148	2.312	118.61
2018-12-28	10169	1.509	42.91	2620	2.017	129.82
2018-12-29	10544	1.881	50.92	3221	2.761	122.99
2018-12-30	10093	3.109	105.28	2677	2.855	128.13
2018-12-31	10191	1.983	88.4	3301	2.573	191.87
2019-01-01	7455	3.887	82.77	3188	2.539	133.27
2019-01-02	7853	3.25	111.39	3012	1.971	181.13
2019-01-03	9821	2.287	55.37	2739	2.651	100.48
2019-01-04	10186	3.37	87	2474	2.793	128.26
2019-01-05	6292	2.527	53.37	2622	3.076	166.03
2019-01-06	10213	2.411	55.59	2244	2.466	139.22
2019-01-07	5452	2.44	62.52	2707	3.827	173.57
2019-01-08	12347	2.365	44.95	2735	2.008	99.73
2019-01-09	11458	2.136	39.83	2247	2.954	131.11
2019-01-10	9044	2.265	41.05	2887	0.78	39.29
2019-01-11	8694	2.063	31.9	3151	0.936	42.3
2019-01-12	9322	2.148	32.6	2800	2.073	124.92
2019-01-13	9033	2.395	45.96	3111	2.497	114.76
2019-01-14	8176	2.468	58.32	2548	2.272	110.79
2019-01-15	8574	2.367	68.25	2951	2.673	131.32
2019-01-16	8231	2.44	65.02	1987	2.435	119.53
2019-01-17	7483	2.403	60.54	2677	2.858	136.34
2019-01-18	6812	2.889	69.5	1878	2.801	148.44
2019-01-19	11922	2.496	62.59	2284	2.933	122.21
2019-01-20	9829	2.577	75.94	2369	3.378	165.04
2019-01-21	9338	2.233	61.92	2207	3.32	154.15
2019-01-22	8163	2.168	62.41	1914	3.207	147.63
2019-01-23	7573	3.426	111.46	2137	3.607	193.91
2019-01-24	8636	2.27	69.75	2131	3.169	151.22
2019-01-25	8120	2.393	65.35	2136	3.103	151.17
2019-01-26	8355	2.743	75.17	1856	3.099	152.32
2019-01-27	8311	2.718	78.72	2790	2.374	170.75
2019-01-28	9016	4.073	125.73	2686	0.837	159.75
2019-01-29	8644	3.165	88.1	1910	2.775	142.41
2019-01-30	9930	2.288	80.53	3248	2.587	147.97
2019-01-31	9502	1.961	66.93	3288	2.899	160.38
2019-02-01	11090	1.879	63.68	2945	2.834	148.73
2019-02-02	10599	2.604	87.35	2647	2.886	145.62
2019-02-03	10492	2.818	87.13	3027	2.755	144.84
2019-02-04	10258	2.643	84.58	4017	2.57	79.07
2019-02-05	10480	5.926	176	3299	3.142	169.66
2019-02-06	9753	2.844	84.41	3071	3.216	182.02
2019-02-07	8865	2.638	80.44	2933	0.591	179.54
2019-02-08	9071	2.725	80.6	3163	3.252	183.17
2019-02-09	9195	2.841	85.93	3283	3.737	215.41
2019-02-10	9017	2.888	85.34	4250	4.496	246.53
2019-02-11	9785	6.265	163.04	4649	3.78	214.94
2019-02-12	11961	2.953	89.99	4606	4.103	181.21
2019-02-13	10743	3.475	102.52	4470	3.307	277.55
2019-02-14	9679	3.353	97.86	2562	3.122	256.81
2019-02-15	9425	3.044	115.31	4135	2.65	208.14
2019-02-16	9082	4.272	124.04	3272	3.317	193.86
2019-02-17	10538	3.147	107.11	2100	3.652	221.55
2019-02-18	10174	4.05	111.41	4117	3.147	180.59
2019-02-19	9514	5.244	143.52	2967	3.613	181.92
2019-02-20	8578	3.18	96.86	3252	2.544	173.87
2019-02-21	11489	2.365	69.73	2642	2.312	177.71
2019-02-22	10833	2.308	65.22	2668	3.348	195.61
2019-02-23	9492	2.31	67.98	2313	3.121	148.99
2019-02-24	10854	2.835	81.96	3354	2.931	133.58
2019-02-25	11331	3.262	94.75	2678	2.554	140.57
2019-02-26	12611	2.53	75.9	2966	3.218	185.78
2019-02-27	13063	2.165	64.22	2946	2.805	144.71
2019-02-28	11515	2.986	87.6	3173	2.193	116.45
2019-03-01	11192	1.787	64.16	2414	2.691	152.16
2019-03-02	10351	2.128	55.11	2858	2.898	148.26
2019-03-03	10150	2.224	46.71	2146	3.075	139.27
2019-03-04	9863.5	5.502	130.98	1498	3.452	152.24
2019-03-05	9577	6.152	117.26	2152	3.774	185.9
2019-03-06	10511	3.385	87.9	3622	2.382	122.64
2019-03-07	9003	3.305	107.43	2857	2.63	134.33
2019-03-08	10073	1.332	97.3	2914	2.013	105.88
2019-03-09	10331	2.106	76.66	2933	2.579	170.4
2019-03-10	7598	2.599	67.43	2956	1.855	142.7
2019-03-11	9603	2.827	72.61	4492	1.069	100.28
2019-03-12	8974	2.64	73.17	4313	1.599	121.25
2019-03-13	8709	4.12	96.52	3162	1.89	146
2019-03-14	10199	2.413	66.83	2110	2.738	162.43
2019-03-15	10186	2.443	68.19	2155	1.521	175.78
2019-03-16	9501	2.49	65.65	3207	2.199	151.18
2019-03-17	8251	2.53	65.04	2755	2.3	154.76
2019-03-18	8963	2.565	71.68	2609	2.456	170.8
2019-03-19	10106	2.588	79.49	2783	2.224	90.55
2019-03-20	9554	2.58	71.63	3258	1.707	133.73
2019-03-21	8504	2.848	68.9	2114	1.944	139.11
2019-03-22	9347	2.534	64.51	2812	1.96	150.19
2019-03-23	8467	4.589	95.05	2071	1.752	168.24
2019-03-24	7491	2.808	70.31	2975	1.862	145.54
2019-03-25	7022	3.057	81.11	2081	1.579	51.69
2019-03-26	9170	2.5	66.21	1991	1.803	157.34
2019-03-27	9820	2.802	76.19	2183	1.907	168.57
2019-03-28	9516	2.522	76.33	2950	2.595	169.17
2019-03-29	9169	2.174	57.94	2085	1.605	130.57
2019-03-30	9467	2.709	66.62	2375	1.503	133.47
2019-03-31	8335	2.839	71.82	2007	1.89	168.64
2019-04-01	8558	2.66	69.89	2280	1.474	177.91
2019-04-02	10524	2.545	73.96	2839	1.541	162.13
2019-04-03	8760	2.115	58.42	2501	1.639	143.44
2019-04-04	8834	2.001	49.84	2397	1.763	130.02
2019-04-05	9407	2.16	55.32	2160	2.771	162.37
2019-04-06	9294	2.379	61.3	2265	2.767	158.84
2019-04-07	9591	2.641	65.09	2154	2.989	193.76
2019-04-08	9749	2.583	69.02	2099	3.231	189.52
2019-04-09	10001	2.253	55.82	1777	3.084	167.13
2019-04-10	8993	2.033	51.67	2029	2.899	176.55
2019-04-11	9525	2.641	71.01	2741	3.422	157.74
2019-04-12	3594	2.841	65.17	1823	3.458	186.99
2019-04-13	9923	2.836	69.21	1475	2.896	178.9
2019-04-14	9591	2.764	64.63	3032	2.715	188.27
2019-04-15	9228	2.73	68.01	2364	3.042	185.86
2019-04-16	8242	2.654	64.77	1834	2.896	222.51
2019-04-17	8916	2.57	56.7	2535	3.464	239.18
2019-04-18	7684	2.637	60.58	2271	2.917	87.36
2019-04-19	8582	3.041	66.64	2106	3.324	195.28
2019-04-20	7208	3.548	82.81	2092	2.894	168.03
2019-04-21	8951	3.077	62.19	2554	3.134	169.69
2019-04-22	8378	3.272	69.12	2470	3.122	164.92
2019-04-23	7978	3.357	71.69	2310	3.848	181.23
2019-04-24	8670	3.355	72.66	2101	2.97	149.88
2019-04-25	7131	2.727	56.47	2164	2.896	149.54
2019-04-26	7513	2.252	56.24	2210	3.279	152.46
2019-04-27	7234	3.009	59.97	2044	3.33	166.19
2019-04-28	7748	2.769	57.58	2115	3.27	159.5
2019-04-29	8259	2.573	52.09	2514	3.06	148.62
2019-04-30	8186	2.578	50.86	2471	2.975	146.55
2019-05-01	8560	2.81	54.9	1822	3.501	140.7
2019-05-02	9274	2.632	51.84	2456	3.636	172.45
2019-05-03	8415	3.1	57.48	2585	3.641	208.13
2019-05-04	8412	2.905	60.35	3255	3.885	206.86
2019-05-05	8271	2.807	58.09	2384	3.839	198.74
2019-05-06	8356	2.656	53.26	1987	4.009	160.13
2019-05-07	8149	2.575	51.15	2503	4.196	192.94
2019-05-08	7787	2.84	56.56	2349	3.747	163.21
2019-05-09	7115	2.846	62.63	1770	3.644	174.62
2019-05-10	8073	2.657	62.11	2297	3.35	167.47
2019-05-11	7534	2.553	61.62	2274	3.191	154.69
2019-05-12	7958	3.266	74.15	2901	2.975	157.93
2019-05-13	8576	2.709	65.93	2109	3.245	163.11
2019-05-14	7661	2.896	63.73	2153	3.307	167.15
2019-05-15	7396	3.215	76.94	2213	3.006	156.82
2019-05-16	8860	2.907	68.99	2655	3.241	138.65
2019-05-17	5814	2.908	74.41	2530	2.905	147.2
2019-05-18	8889	3.669	87.11	2289	3.066	173.78
2019-05-19	9126	2.811	72.34	2781	3.067	148.74
2019-05-20	8750	3.581	77.11	2558	2.655	141.99
2019-05-21	7599	5.863	91.01	2495	2.641	155.57
2019-05-22	8532	5.883	141.63	2238	1.967	151.16
2019-05-23	8300	3.469	88.63	2558	3.127	134.29
2019-05-24	8116	2.929	79.15	2588	3.372	153.77
2019-05-25	8397	2.395	65.88	2475	3.404	154.28
2019-05-26	8230	3.048	82.06	2208	3.281	142.1
2019-05-27	8176	2.829	74.85	2664	3.189	132.97
2019-05-28	8360	4.39	106.82	2524	3.005	128.53
2019-05-29	8843	2.202	64.5	1901	3.392	154.56
2019-05-30	9592	2.634	69.45	2001	3.376	149.46
2019-05-31	8629	2.753	80.82	2108	3.453	145.72
2019-06-01	9024	5.035	136.54	2730	3.364	143.66
2019-06-02	9094	2.508	68.72	2594	2.709	123.06
2019-06-03	9207	2.498	57.96	2099	3.155	133.77
2019-06-04	8760	2.28	171.35	1863	3.703	173.91
2019-06-05	8776	2.848	93.56	2498	3.062	129.18
2019-06-06	8871	2.862	128.4	2772	3.128	125.95
2019-06-07	9596	1.214	71.78	2145	3.438	148.86
2019-06-08	8735	2.869	76.35	2494	3.254	142.77
2019-06-09	8919	2.866	72.72	3325	2.992	142.69
2019-06-10	9177	2.774	73.3	2822	3.138	135.05
2019-06-11	8255	2.211	60.07	2076	3.197	140.81
2019-06-12	6802	2.864	77.45	2156	3.274	132.14
2019-06-13	9220	3.592	96.85	2661	3.234	134.59
2019-06-14	7728	2.612	71.69	2557	3.074	130.85
2019-06-15	8608	2.779	78.44	2512	2.979	131.93
2019-06-16	9391	2.773	76.52	2598	4.102	162.27
2019-06-17	10743	3.22	79.94	2594	3.899	157.05
2019-06-18	9297	2.274	63.1	2527	3.345	151.86
2019-06-19	10065	2.758	78.56	2539	2.497	139.42
2019-06-20	8292	7.113	162.8	2465	2.635	133.56
2019-06-21	7930	3.446	96.77	2572	2.529	135.57
2019-06-22	10019	3.063	82.44	2478	2.26	132.66
2019-06-23	7466	4.306	93.97	2858	2.675	136.23
2019-06-24	9242	2.766	74.11	2864	2.23	121.77
2019-06-25	8572	3.017	77.92	2893	2.6	133.45
2019-06-26	9008	2.859	80.26	2932	2.838	88.98
2019-06-27	8179	2.622	79.26	2662	5.165	169.42
2019-06-28	8938	3.225	85.1	3412	3.549	148.55
2019-06-29	10540	3.383	86.07	2485	2.953	112.39
2019-06-30	10809	4.294	123.53	2925	3.506	134.67
Note: The values in bold are the missing values which are replaced by linear interpolation results of adjacent monitoring values.

## Sheet: Rainfall Data
Table S2. Rainfall data from the weather station.
Date	Daily Rainfall (mm)
2018-07-01	0
2018-07-02	0
2018-07-03	0
2018-07-04	0
2018-07-05	0
2018-07-06	0
2018-07-07	14.1
2018-07-08	0.1
2018-07-09	0
2018-07-10	19.1
2018-07-11	0.2
2018-07-12	1.5
2018-07-13	0
2018-07-14	0
2018-07-15	0
2018-07-16	2.6
2018-07-17	0
2018-07-18	5.4
2018-07-19	0.8
2018-07-20	0
2018-07-21	0
2018-07-22	4
2018-07-23	31.6
2018-07-24	7.7
2018-07-25	5.1
2018-07-26	1
2018-07-27	0
2018-07-28	2
2018-07-29	3.9
2018-07-30	33.6
2018-07-31	14.9
2018-08-01	4.2
2018-08-02	0.3
2018-08-03	14.3
2018-08-04	20.5
2018-08-05	6.6
2018-08-06	0.6
2018-08-07	2
2018-08-08	19.3
2018-08-09	21
2018-08-10	22.1
2018-08-11	25
2018-08-12	21.6
2018-08-13	0.1
2018-08-14	4.7
2018-08-15	0.1
2018-08-16	0
2018-08-17	0.8
2018-08-18	0
2018-08-19	0
2018-08-20	0
2018-08-21	0
2018-08-22	45.6
2018-08-23	23.8
2018-08-24	0
2018-08-25	10.6
2018-08-26	2.5
2018-08-27	10.2
2018-08-28	0
2018-08-29	0
2018-08-30	18.9
2018-08-31	1.1
2018-09-01	0
2018-09-02	0
2018-09-03	3.8
2018-09-04	0.8
2018-09-05	0
2018-09-06	0
2018-09-07	7.5
2018-09-08	13
2018-09-09	19.1
2018-09-10	0
2018-09-11	0
2018-09-12	0
2018-09-13	0
2018-09-14	2.4
2018-09-15	0
2018-09-16	4.3
2018-09-17	34.1
2018-09-18	5.2
2018-09-19	5.2
2018-09-20	4.6
2018-09-21	0
2018-09-22	0.5
2018-09-23	2.1
2018-09-24	0.1
2018-09-25	0
2018-09-26	0
2018-09-27	0
2018-09-28	0
2018-09-29	0.4
2018-09-30	0
2018-10-01	3
2018-10-02	1.1
2018-10-03	0.1
2018-10-04	4.4
2018-10-05	1.4
2018-10-06	0
2018-10-07	0
2018-10-08	3.2
2018-10-09	0
2018-10-10	0
2018-10-11	0
2018-10-12	6.3
2018-10-13	19.1
2018-10-14	4.8
2018-10-15	9.7
2018-10-16	0
2018-10-17	0
2018-10-18	0
2018-10-19	0
2018-10-20	0
2018-10-21	0
2018-10-22	0
2018-10-23	0
2018-10-24	0
2018-10-25	0
2018-10-26	0
2018-10-27	0
2018-10-28	0
2018-10-29	0
2018-10-30	1.5
2018-10-31	0
2018-11-01	0
2018-11-02	0
2018-11-03	0
2018-11-04	0
2018-11-05	0
2018-11-06	0
2018-11-07	0
2018-11-08	0
2018-11-09	0
2018-11-10	0
2018-11-11	0
2018-11-12	0
2018-11-13	0
2018-11-14	0
2018-11-15	0
2018-11-16	0
2018-11-17	0
2018-11-18	0
2018-11-19	0
2018-11-20	0
2018-11-21	0
2018-11-22	0
2018-11-23	0
2018-11-24	0
2018-11-25	0
2018-11-26	0
2018-11-27	0
2018-11-28	0
2018-11-29	0
2018-11-30	0
2018-12-01	0
2018-12-02	0
2018-12-03	0
2018-12-04	0
2018-12-05	0
2018-12-06	0
2018-12-07	0
2018-12-08	2
2018-12-09	4.1
2018-12-10	0
2018-12-11	0
2018-12-12	0
2018-12-13	0
2018-12-14	0
2018-12-15	0
2018-12-16	0
2018-12-17	0
2018-12-18	0
2018-12-19	42.6
2018-12-20	0
2018-12-21	0
2018-12-22	0
2018-12-23	0
2018-12-24	0
2018-12-25	0
2018-12-26	0
2018-12-27	0
2018-12-28	0
2018-12-29	3.4
2018-12-30	0
2018-12-31	0
2019-01-01	0
2019-01-02	0
2019-01-03	0
2019-01-04	0
2019-01-05	0
2019-01-06	0
2019-01-07	0
2019-01-08	2.9
2019-01-09	0
2019-01-10	0.6
2019-01-11	0
2019-01-12	0
2019-01-13	0
2019-01-14	0
2019-01-15	0
2019-01-16	0
2019-01-17	0
2019-01-18	0
2019-01-19	0
2019-01-20	0
2019-01-21	0
2019-01-22	0
2019-01-23	0
2019-01-24	0
2019-01-25	0
2019-01-26	0
2019-01-27	0
2019-01-28	0
2019-01-29	0
2019-01-30	21.6
2019-01-31	0
2019-02-01	0
2019-02-02	0
2019-02-03	0
2019-02-04	0
2019-02-05	0
2019-02-06	0
2019-02-07	0
2019-02-08	0
2019-02-09	0
2019-02-10	0
2019-02-11	0
2019-02-12	0
2019-02-13	0
2019-02-14	0
2019-02-15	0
2019-02-16	0
2019-02-17	3.4
2019-02-18	2.1
2019-02-19	0.8
2019-02-20	0.4
2019-02-21	0
2019-02-22	0
2019-02-23	0
2019-02-24	0
2019-02-25	3.2
2019-02-26	8.3
2019-02-27	0
2019-02-28	4.8
2019-03-01	7
2019-03-02	0
2019-03-03	0
2019-03-04	0.1
2019-03-05	1.1
2019-03-06	2.6
2019-03-07	2.8
2019-03-08	1.1
2019-03-09	0
2019-03-10	0
2019-03-11	0
2019-03-12	0
2019-03-13	0
2019-03-14	0
2019-03-15	0
2019-03-16	0
2019-03-17	0
2019-03-18	0.1
2019-03-19	11.4
2019-03-20	0.3
2019-03-21	0
2019-03-22	0
2019-03-23	0.1
2019-03-24	0
2019-03-25	0
2019-03-26	0
2019-03-27	3.6
2019-03-28	0
2019-03-29	0
2019-03-30	0
2019-03-31	0
2019-04-01	5.7
2019-04-02	0.7
2019-04-03	0.2
2019-04-04	0
2019-04-05	0.3
2019-04-06	0
2019-04-07	0
2019-04-08	0.4
2019-04-09	0
2019-04-10	0
2019-04-11	0
2019-04-12	3
2019-04-13	0
2019-04-14	0.7
2019-04-15	0
2019-04-16	0
2019-04-17	0
2019-04-18	0
2019-04-19	0
2019-04-20	0
2019-04-21	0.1
2019-04-22	0
2019-04-23	0
2019-04-24	0
2019-04-25	0
2019-04-26	0
2019-04-27	0
2019-04-28	0
2019-04-29	0
2019-04-30	0
2019-05-01	0
2019-05-02	0
2019-05-03	0
2019-05-04	0
2019-05-05	0.2
2019-05-06	0
2019-05-07	0
2019-05-08	0
2019-05-09	0
2019-05-10	0
2019-05-11	0
2019-05-12	0
2019-05-13	0
2019-05-14	0
2019-05-15	0
2019-05-16	0
2019-05-17	0
2019-05-18	0
2019-05-19	0
2019-05-20	0
2019-05-21	0
2019-05-22	0
2019-05-23	0
2019-05-24	0
2019-05-25	0
2019-05-26	0
2019-05-27	0
2019-05-28	0
2019-05-29	0
2019-05-30	0
2019-05-31	0
2019-06-01	0
2019-06-02	18.4
2019-06-03	0
2019-06-04	1.9
2019-06-05	0
2019-06-06	0
2019-06-07	2.6
2019-06-08	0
2019-06-09	0.5
2019-06-10	0
2019-06-11	0.1
2019-06-12	0
2019-06-13	0
2019-06-14	9.9
2019-06-15	0
2019-06-16	0
2019-06-17	0
2019-06-18	0
2019-06-19	4.5
2019-06-20	0
2019-06-21	0
2019-06-22	0
2019-06-23	0
2019-06-24	0
2019-06-25	12.7
2019-06-26	0.7
2019-06-27	0
2019-06-28	0
2019-06-29	0.1
2019-06-30	8.2

## Sheet: COD and TP in sewage
Table S3. Pollutant concentrations in sanitary sewage from villages in dry weather conditions and the corresponding population equivalent
System code	Village Code	COD concentration of domestic sewage (mg L-1)	TP concentration of domestic sewage (mg L-1)	Population equivalent in 2018
System 1	V1	109	3.89	1552
	V2	128	4.16	974
	V3	132	3.45	1836
	V4	148	3.14	765
	V5	152	4.36	1046
	V6	157	5.45	1428
	V7	165	3.5	1089
	V8	168	5.17	2306
	V9	170	4.04	542
	V10	174	3.08	995
	V11	178	3.61	2572
	V12	182	3.32	454
	V13	187	5.66	1661
	V14	192	4.61	1656
	V15	206	3.82	880
	V16	217	5.41	1245
	V17	228	4.33	1462
	V18	246	3.68	1523
	V19	285	5.87	770
System 2	V1	258	4.19	11252
	V2	236	3.8	4426
	V3	215	3.38	3453
	V4	193	2.82	2768
