# Supplementary material for: Simple method to quantify extraneous water and organic matter degradation in sewer networks
Source: Royal Society of Chemistry journal article supplement (doi:10.1039/d0ew00735h), 2020-11-12
Supplement: d0ew00735h3.pdf [file d0ew00735h3.pdf]

**Supporting information for**

**Simple method to quantify the extraneous water and  
the organic matter degradation in sewer networks**

**Fengle Yang<sup>a,b</sup>, Xianzhi Zhang<sup>b</sup>, Jinhua Li<sup>a,\*</sup>, Fangming Jin<sup>a</sup> and Baoxue**

**Zhou<sup>a,c,d,\*</sup>**

<sup>a</sup> School of Environmental Science and Engineering, Shanghai Jiao Tong University,  
Shanghai 200240, PR China.

<sup>b</sup>Yunnan Appraisal Center for Ecological and Environmental Engineering, Kunming  
650032, PR China.

<sup>c</sup> Shanghai Institute of Pollution Control and Ecological Security, Shanghai 200092,  
PR China.

<sup>d</sup> Yunnan Key Laboratory of Pollution Process and Management of Plateau Lake-  
Watershed, Yunnan 650034, PR China.

---

\* Corresponding authors: [lijinhua@sjtu.edu.cn](mailto:lijinhua@sjtu.edu.cn), [zhoubaoxue@sjtu.edu.cn](mailto:zhoubaoxue@sjtu.edu.cn).

Fax: +86-21-54747351; Tel: +86-21-54747351

---

**Table S1.** On-line monitoring data of the influent wastewater of WWTPs

See Excel Table S1.

**Table S2.** Rainfall data from the weather station.

See Excel Table S2.

**Table S3.** Pollutant concentrations in sanitary sewage from villages in dry weather conditions and the corresponding population equivalent

See Excel Table S3.

**Table S4.** QA data

See Excel Table S4.
